# Supplementary material for: Functional Cross-Talking between Differentially Expressed and Alternatively Spliced Genes in Human Liver Cancer Cells Treated with Berberine
Source: PLoS One. 2015 Nov 25;10(11):e0143742. doi: 10.1371/journal.pone.0143742 (PMC4659683; doi:10.1371/journal.pone.0143742)
Supplement: S1 File — There are four supplementary tables. Table A, information about all the DEGs. Table B, information about all the DASGs. Table C, expression data of DEGs in p53 signaling pathway. Table D, expression data of DEGs in NFκB pathway. (XLSX) [file pone.0143742.s001.xlsx]

## Sheet: Table A
Table A. Differentially expressed genes
Gene ID	GeneSymbol	Locus	baseMean	baseMean_DMSO	baseMean_Berberine	foldChange	log2FoldChange	pvalue
ENSG00000140465	CYP1A1	15:75011882-75017951	2075.45	15.696	4135.21	263.456	8.04142	6.77148e-15
ENSG00000127129	EDN2	1:41944445-41950344	201.132	6.46307	395.801	61.2403	5.93641	2.10142e-08
ENSG00000114812	VIPR1	3:42530790-42579059	95.1361	12.0028	178.269	14.8523	3.89261	0.000146575
ENSG00000166592	RRAD	16:66955581-66959547	50.9823	6.46307	95.5015	14.7765	3.88523	0.000949082
ENSG00000205420	KRT6A	12:52880957-52887041	64.5702	9.23296	119.907	12.9869	3.69898	0.000725878
ENSG00000204388	HSPA1B	6:31795511-31798031	7137.56	1032.24	13242.9	12.8292	3.68136	7.34886e-06
ENSG00000241836	AC073321.5.1	2:217250010-217443903	69.8069	10.1563	129.458	12.7466	3.67204	0.000626607
ENSG00000204389	HSPA1A	6:31777395-31785723	6272.27	917.756	11626.8	12.6687	3.6632	8.08978e-06
ENSG00000232043	RP4-530I15.9.1	20:49126890-49201299	116.937	18.4659	215.409	11.6652	3.54414	0.000256266
ENSG00000211459	J01415.23	MT:647-1601	41282.3	6786.23	75778.3	11.1665	3.4811	1.78719e-05
ENSG00000169715	MT1E	16:56659386-56661024	620.331	105.256	1135.41	10.7871	3.43124	4.40569e-05
ENSG00000124635	HIST1H2BJ	6:27094057-27100541	518.573	89.5597	947.587	10.5805	3.40334	5.60176e-05
ENSG00000137193	PIM1	6:37137978-37143202	3470.35	612.145	6328.56	10.3383	3.36993	3.36154e-05
ENSG00000141854	AC022098.1	19:14183347-14185873	37.6493	7.38637	67.9122	9.19426	3.20073	0.00870718
ENSG00000184678	HIST2H2BE	1:149856009-149858232	1602.15	314.844	2889.45	9.17741	3.19809	8.30028e-05
ENSG00000257298	RP3-405J10.3.1	12:50569570-50677353	55.4128	11.0796	99.746	9.00271	3.17036	0.00381269
ENSG00000125347	IRF1	5:131817300-131826490	5268.04	1058.1	9477.99	8.95758	3.16311	8.23094e-05
ENSG00000187990	HIST1H2BG	6:26216427-26216872	70.5235	14.7727	126.274	8.54779	3.09555	0.00272843
ENSG00000158246	FAM46B	1:27331510-27339327	441.297	94.1762	788.418	8.37173	3.06553	0.000251088
ENSG00000163659	TIPARP	3:156389650-156424559	4096.13	878.978	7313.29	8.32022	3.05662	0.000134674
ENSG00000250509	CTC-573N18.1.1	5:179868558-179870238	85.1036	18.4659	151.741	8.21737	3.03868	0.00219753
ENSG00000203691	AC092811.1	1:224102740-226595780	45.9315	10.1563	81.7068	8.04497	3.00809	0.00822844
ENSG00000175155	YPEL2	17:57409052-57479095	598.819	137.571	1060.07	7.70559	2.94591	0.000340197
ENSG00000226198	RP11-69D4.5.1	10:5029966-5060207	40.1643	9.23296	71.0955	7.70019	2.94489	0.0123757
ENSG00000104140	RHOV	15:41164411-41166487	2187.28	507.813	3866.75	7.61452	2.92875	0.000251885
ENSG00000258086	RP11-753H16.5.1	12:54747444-54891472	34.397	8.30966	60.4843	7.27879	2.8637	0.0196788
ENSG00000100906	NFKBIA	14:35870716-35873955	9901.69	2462.43	17340.9	7.04221	2.81603	0.000364608
ENSG00000138061	CYP1B1	2:38150329-38408997	2515.81	634.304	4397.31	6.9325	2.79337	0.00043867
ENSG00000197846	HIST1H2BF	6:26199747-26200942	115.049	29.5455	200.553	6.78795	2.76298	0.00298787
ENSG00000141738	GRB7	17:37894186-37903545	591.673	155.114	1028.23	6.6289	2.72877	0.000811963
ENSG00000197409	HIST1H3D	6:26197067-26199521	38.5036	10.1563	66.851	6.58225	2.71858	0.0208028
ENSG00000125657	TNFSF9	19:6531009-6535939	129.492	35.0852	223.898	6.38154	2.6739	0.00334848
ENSG00000126368	NR1D1	17:38218445-38256978	1035.45	287.145	1783.76	6.21204	2.63507	0.000977909
ENSG00000123388	HOXC11	12:54356091-54371427	202.185	56.3211	348.05	6.17975	2.62755	0.00239341
ENSG00000226381	RP11-119F19.2.1	10:81524485-81546199	62.8888	17.5426	108.235	6.16983	2.62523	0.0109073
ENSG00000052802	MSMO1	4:166248774-166264312	3995.84	1120.88	6870.8	6.12982	2.61584	0.00087852
ENSG00000203812	HIST2H2AA4	1:149822642-149823191	292.574	82.1733	502.974	6.1209	2.61374	0.00185704
ENSG00000129355	CDKN2D	19:10677138-10679655	82.1062	23.0824	141.13	6.11418	2.61216	0.00746559
ENSG00000087074	PPP1R15A	19:49375648-49379318	4762.83	1358.17	8167.5	6.01361	2.58823	0.00097307
ENSG00000217801	RP11-465B22.3.1	1:995113-1004735	103.377	29.5455	177.208	5.99782	2.58444	0.00583812
ENSG00000115112	TFCP2L1	2:121974162-122042783	242.005	70.1705	413.84	5.89763	2.56014	0.00258271
ENSG00000099992	TBC1D10A	22:30279143-31530682	385.732	113.565	657.899	5.79313	2.53434	0.00208378
ENSG00000227292	AC009229.5.1	2:38430504-38466732	52.4154	15.696	89.1347	5.67881	2.50559	0.0191369
ENSG00000146232	NFKBIE	6:44225918-44233500	541.18	163.423	918.936	5.62304	2.49135	0.00208719
ENSG00000123364	HOXC13	12:54329111-54340328	416.532	127.415	705.65	5.53821	2.46942	0.00253714
ENSG00000128016	ZFP36	19:39897486-39900045	2563.45	792.188	4334.71	5.47182	2.45202	0.00175513
ENSG00000122691	TWIST1	7:19060613-19157295	417.318	131.108	703.528	5.36601	2.42385	0.00298847
ENSG00000243649	CFB	6:31865561-31919861	317.124	101.563	532.686	5.24491	2.39092	0.00386879
ENSG00000181218	HIST3H2A	1:228645064-228645560	54.3998	17.5426	91.257	5.20201	2.37907	0.0238908
ENSG00000004799	PDK4	7:95212810-95225828	713.612	234.517	1192.71	5.0858	2.34647	0.00325798
ENSG00000183558	HIST2H2AA3	1:149813504-149814478	331.222	111.719	550.725	4.92957	2.30146	0.00514346
ENSG00000138623	SEMA7A	15:74701629-74726808	49.1631	16.6193	81.7068	4.91637	2.29759	0.0327002
ENSG00000148926	ADM	11:10326226-10328944	4100.38	1397.87	6802.89	4.86661	2.28292	0.00327314
ENSG00000164400	CSF2	5:131409482-131411859	62.0826	21.2358	102.929	4.84697	2.27708	0.0251211
ENSG00000099860	GADD45B	19:2476122-2478257	1207.99	413.637	2002.35	4.84084	2.27526	0.00378755
ENSG00000228456	RP11-187C18.6.1	9:45442003-45442713	45.518	15.696	75.3401	4.79994	2.26302	0.0389186
ENSG00000157514	TSC22D3	X:106956450-107020572	821.771	285.298	1358.24	4.76078	2.2512	0.00445641
ENSG00000063438	AHRR	5:271735-438406	72.8798	25.8523	119.907	4.63817	2.21356	0.0239604
ENSG00000108602	ALDH3A1	17:19641296-19651746	938.556	334.233	1542.88	4.61618	2.2067	0.00509264
ENSG00000232810	TNF	6:31543343-31546113	53.7314	19.3892	88.0736	4.5424	2.18346	0.0370088
ENSG00000168274	HIST1H2AE	6:26217164-26217711	84.2077	30.4688	137.947	4.52748	2.17871	0.022192
ENSG00000186832	KRT16	17:39766029-39769005	797.482	290.838	1304.13	4.48402	2.16479	0.00611945
ENSG00000232442	CTD-3184A7.4.1	20:62258579-62260177	143.569	52.6279	234.509	4.45599	2.15575	0.01422
ENSG00000203564	RP11-570D4.2.1	9:114659045-114697649	62.4753	23.0824	101.868	4.41324	2.14184	0.0338374
ENSG00000109511	ANXA10	4:168867824-169108893	58.8303	22.1591	95.5015	4.30981	2.10762	0.0390942
ENSG00000136653	RASSF5	1:206680878-206785904	90.2988	34.162	146.436	4.28651	2.0998	0.0251824
ENSG00000160213	CSTB	21:38435145-45747259	395.247	149.574	640.921	4.28498	2.09929	0.00941424
ENSG00000187837	HIST1H1C	6:26055967-26056699	2020.03	765.412	3274.64	4.27827	2.09703	0.00683676
ENSG00000224345	AKIRIN2-AS1	6:88384789-88411927	104.741	39.7017	169.78	4.2764	2.0964	0.0220508
ENSG00000215895	RP11-334L9.1.1	1:39174625-39176564	54.6547	21.2358	88.0736	4.14741	2.05221	0.0477856
ENSG00000099251	HSD17B7P2	10:38645304-38667433	56.708	22.1591	91.257	4.11826	2.04204	0.0468695
ENSG00000169242	EFNA1	1:155099935-155107333	5827.27	2280.54	9374	4.11043	2.03929	0.00796082
ENSG00000105327	BBC3	19:47724078-47736023	128.851	50.7813	206.92	4.07473	2.0267	0.022293
ENSG00000167604	NFKBID	19:36379142-36393185	74.7264	29.5455	119.907	4.0584	2.02091	0.0368003
ENSG00000060566	CREB3L3	19:4153628-4173050	659.736	266.833	1052.64	3.94494	1.98	0.0120712
ENSG00000044574	HSPA5	9:127997131-128003622	44940.1	18178.8	71701.4	3.94424	1.97975	0.0096065
ENSG00000138764	CCNG2	4:78078303-78415440	1486.6	604.759	2368.44	3.91633	1.9695	0.0110322
ENSG00000205189	ZBTB10	8:81397853-81438500	702.373	292.685	1112.06	3.79952	1.92582	0.0142691
ENSG00000146112	PPP1R18	6:30644165-30655672	4001.13	1668.4	6333.87	3.79638	1.92463	0.0120793
ENSG00000129353	SLC44A2	19:10713120-10755235	1138.12	475.497	1800.73	3.78705	1.92108	0.0134189
ENSG00000183421	RIPK4	21:38435145-45747259	80.7486	34.162	127.335	3.7274	1.89817	0.0455695
ENSG00000186480	INSIG1	7:155089485-155101945	6851.94	2911.15	10792.7	3.70737	1.8904	0.0133837
ENSG00000186642	PDE2A	11:72287184-72385635	149.639	63.7074	235.57	3.69769	1.88662	0.0294162
ENSG00000166106	ADAMTS15	11:130318868-130346532	77.6342	33.2387	122.03	3.67132	1.8763	0.0495973
ENSG00000168389	MFSD2A	1:40420801-40435638	269.401	115.412	423.39	3.66851	1.87519	0.0223186
ENSG00000137868	STRA6	15:74471806-74628813	81.2103	35.0852	127.335	3.62931	1.8597	0.0495779
ENSG00000162825	RP3-377D14.1.1	1:144146807-144224481	113.071	48.9347	177.208	3.62132	1.85652	0.0385385
ENSG00000198355	PIM3	22:50354160-50357728	2482.4	1074.72	3890.09	3.61965	1.85585	0.0156235
ENSG00000188483	IER5L	9:131937834-131972827	202.495	87.7131	317.277	3.61721	1.85488	0.0270468
ENSG00000196544	C17orf59	17:8091651-8093564	109.957	48.0114	171.903	3.58046	1.84014	0.0409844
ENSG00000215784	FAM72D	1:143896451-143913143	405.362	184.659	626.065	3.39038	1.76145	0.0273441
ENSG00000158615	PPP1R15B	1:204346977-204463852	10435	4771.59	16098.4	3.37379	1.75437	0.0210214
ENSG00000155130	MARCKS	6:114178540-114184648	629.686	292.685	966.687	3.30283	1.7237	0.0278049
ENSG00000145911	N4BP3	5:177540443-177553088	357.86	167.117	548.603	3.28276	1.71491	0.0325454
ENSG00000100439	ABHD4	14:23064714-23081265	917.202	428.409	1405.99	3.28189	1.71453	0.0270158
ENSG00000196850	PPTC7	12:110928901-111021125	2423.35	1133.81	3712.89	3.27471	1.71137	0.0251676
ENSG00000187608	ISG15	1:948802-949920	199.89	94.1762	305.605	3.24503	1.69823	0.0421496
ENSG00000180596	HIST1H2BC	6:26115128-26124154	224.992	106.179	343.805	3.23798	1.69509	0.0404364
ENSG00000141441	FAM59A	18:29843505-30050447	658.481	312.074	1004.89	3.22003	1.68707	0.0308743
ENSG00000113916	BCL6	3:187416046-187463515	1300	616.762	1983.25	3.21558	1.68508	0.0285444
ENSG00000026103	FAS	10:90639490-90775542	595.358	283.452	907.264	3.20077	1.67842	0.0322591
ENSG00000181649	PHLDA2	11:2949502-2950685	505.679	240.98	770.379	3.19685	1.67665	0.0334781
ENSG00000184371	CSF1	1:110452863-110473614	333.013	158.807	507.219	3.19394	1.67534	0.0373051
ENSG00000143367	TUFT1	1:151512780-151556059	795.111	379.475	1210.75	3.19059	1.67382	0.0312408
ENSG00000204386	NEU1	6:31825435-31830683	895.311	430.256	1360.37	3.16176	1.66073	0.0320214
ENSG00000146674	IGFBP3	7:45951849-45961473	262.738	126.492	398.984	3.15423	1.65729	0.0423742
ENSG00000105376	ICAM5	19:10400654-10407453	206.374	99.716	313.033	3.13924	1.65042	0.0473284
ENSG00000184557	SOCS3	17:76352863-76356158	1221.15	592.756	1849.55	3.12025	1.64166	0.0328592
ENSG00000168394	TAP1	6:32808493-32847625	438.774	213.281	664.266	3.1145	1.639	0.0385977
ENSG00000173801	JUP	17:39775688-39943183	1920.93	934.375	2907.49	3.11169	1.6377	0.0321778
ENSG00000125148	MT2A	16:56642110-56643409	4192.32	2049.72	6334.93	3.09064	1.6279	0.032138
ENSG00000115008	IL1A	2:113531491-113542167	3202.6	4746.66	1658.54	0.349412	-1.517	0.0455529
ENSG00000114491	UMPS	3:124449212-124464040	481.267	738.637	223.898	0.303123	-1.72202	0.0296493
ENSG00000148411	NACC2	9:138898382-138987131	398.852	613.069	184.636	0.301167	-1.73136	0.0302277
ENSG00000115963	RND3	2:151324708-151395525	3764.04	5797.38	1730.7	0.298531	-1.74405	0.0222397
ENSG00000107984	DKK1	10:54074055-54077802	337.37	519.816	154.925	0.298038	-1.74643	0.0303717
ENSG00000155657	TTN	2:179387553-179914813	314.522	484.73	144.313	0.297719	-1.74798	0.0309369
ENSG00000138829	FBN2	5:127593600-128369335	6480.13	9996.53	2963.73	0.296476	-1.75401	0.021212
ENSG00000131016	AKAP12	6:151561133-151679692	7562.19	11677.8	3446.54	0.295135	-1.76055	0.0206987
ENSG00000165660	FAM175B	10:126490353-126525239	291.143	449.645	132.641	0.29499	-1.76126	0.0305734
ENSG00000064393	HIPK2	7:139246315-139720125	5137.3	7934.81	2339.79	0.294876	-1.76182	0.0207849
ENSG00000177000	MTHFR	1:11821843-11908402	137.482	212.358	62.6065	0.294816	-1.76211	0.0436875
ENSG00000163393	SLC22A15	1:116519118-116612675	256.409	396.094	116.724	0.294688	-1.76274	0.0319522
ENSG00000144824	PHLDB2	3:111393522-111695364	9201.07	14216	4186.15	0.294468	-1.76382	0.0204119
ENSG00000153162	BMP6	6:7726331-8102811	616.49	952.841	280.138	0.294002	-1.7661	0.024563
ENSG00000175137	SH3BP5L	1:249104647-249120832	246.37	381.321	111.418	0.29219	-1.77502	0.0313536
ENSG00000184792	OSBP2	22:30279143-31530682	1363.58	2110.65	616.515	0.292097	-1.77548	0.0213361
ENSG00000180447	GAS1	9:89559278-89562104	584.987	905.753	264.221	0.291714	-1.77737	0.023965
ENSG00000159216	RUNX1	21:36160097-37357047	1741.16	2696.02	786.295	0.29165	-1.77769	0.0207481
ENSG00000166068	SPRED1	15:38544526-38649450	277.273	429.333	125.213	0.291646	-1.77771	0.0296767
ENSG00000211448	DIO2	14:80663872-80921812	430.403	666.62	194.186	0.2913	-1.77942	0.0256098
ENSG00000137574	TGS1	8:56608982-56738007	372.359	577.06	167.658	0.290539	-1.7832	0.0263922
ENSG00000248323	RP11-213H15.3.1	5:90598845-90610219	497.356	771.875	222.837	0.288695	-1.79238	0.0237171
ENSG00000116761	CTH	1:70876900-70905534	206.351	320.384	92.3181	0.288149	-1.79512	0.0320675
ENSG00000143971	ETAA1	2:67624450-67637677	618.522	961.151	275.893	0.287045	-1.80065	0.0220246
ENSG00000131746	TNS4	17:38632079-38657854	1937.77	3011.79	863.758	0.286792	-1.80192	0.0190149
ENSG00000261824	CTC-459F4.2.1	19:28221180-28237138	112.188	174.503	49.873	0.2858	-1.80692	0.0445487
ENSG00000138685	FGF2	4:123747862-123844123	669.758	1042.4	297.116	0.28503	-1.81081	0.0209979
ENSG00000108786	HSD17B1	17:40703983-40707857	103.141	160.653	45.6285	0.284018	-1.81595	0.0462929
ENSG00000160336	ZNF761	19:53935226-53961515	247.155	385.014	109.296	0.283875	-1.81667	0.027767
ENSG00000172086	KRCC1	2:88326723-88355248	280.897	437.642	124.152	0.283684	-1.81765	0.0262634
ENSG00000109654	TRIM2	4:154073493-154260472	113.111	176.35	49.873	0.282808	-1.82211	0.0426503
ENSG00000027075	PRKCH	14:61654276-62125414	103.603	161.577	45.6285	0.282395	-1.82421	0.0452212
ENSG00000172572	PDE3A	12:20514665-20837315	828.752	1293.54	363.967	0.281373	-1.82944	0.0190602
ENSG00000184185	KCNJ12	17:21279698-21320404	140.183	218.821	61.5454	0.281259	-1.83003	0.036172
ENSG00000172123	SLFN12	17:33738078-33760218	125.92	196.662	55.1786	0.280576	-1.83354	0.0384617
ENSG00000196417	ZNF765	19:53893045-53930574	145.399	227.131	63.6677	0.280313	-1.83489	0.0348961
ENSG00000251474	RPL32P3	3:129100140-129118498	194.327	303.764	84.8902	0.279461	-1.83928	0.0291906
ENSG00000174652	ZNF266	19:9523271-9546234	404.302	632.458	176.147	0.278512	-1.84419	0.0213633
ENSG00000011258	MBTD1	17:49254785-49337524	403.772	632.458	175.086	0.276834	-1.8529	0.0208019
ENSG00000132467	UTP3	4:71554195-71556267	321.102	503.196	139.008	0.276249	-1.85596	0.0222543
ENSG00000171606	ZNF274	19:58694395-58724927	284.521	445.952	123.091	0.276018	-1.85717	0.0232325
ENSG00000107815	C10orf2	10:102729214-102754158	421.266	661.08	181.453	0.274479	-1.86523	0.0197639
ENSG00000227184	EPPK1	8:144939496-144952632	251.703	395.171	108.235	0.273894	-1.86831	0.023679
ENSG00000146587	RBAK	7:5013618-5112854	612.617	962.074	263.16	0.273534	-1.87021	0.0176782
ENSG00000188060	RAB42	1:28915834-28969597	108.75	170.81	46.6896	0.273343	-1.87122	0.0388296
ENSG00000173559	OBFC2A	2:192542793-192553251	1004.83	1578.84	430.818	0.27287	-1.87371	0.0160239
ENSG00000141446	ESCO1	18:19109263-19180845	346.651	544.745	148.558	0.272711	-1.87456	0.020453
ENSG00000213859	KCTD11	17:7255207-7258258	103.995	163.423	44.5674	0.272711	-1.87456	0.0398493
ENSG00000101745	ANKRD12	18:9136757-9285206	404.096	635.228	172.964	0.272286	-1.8768	0.0193044
ENSG00000198464	ZNF480	19:52800424-52827333	169.033	265.909	72.1567	0.271358	-1.88173	0.028025
ENSG00000100664	EIF5	14:103799880-103811362	3213.4	5056.89	1369.92	0.270901	-1.88416	0.0140186
ENSG00000138347	MYPN	10:69865911-69971774	731.592	1152.27	310.91	0.269823	-1.88991	0.0159966
ENSG00000177706	FAM20C	7:182934-300711	362.23	570.597	153.863	0.269654	-1.89082	0.019154
ENSG00000196418	ZNF124	1:247285276-247335310	88.2786	139.418	37.1395	0.26639	-1.90839	0.0419657
ENSG00000113739	STC2	5:172741715-172756506	2326.08	3673.79	978.36	0.266308	-1.90883	0.0131169
ENSG00000063587	ZNF275	X:152599612-152625568	189.366	299.148	79.5846	0.266038	-1.9103	0.0242043
ENSG00000092439	TRPM7	15:50844669-50979012	1509.58	2386.72	632.432	0.26498	-1.91605	0.0132524
ENSG00000113645	WWC1	5:167718655-167899308	1267.52	2004.48	530.564	0.26469	-1.91763	0.0134316
ENSG00000089195	TRMT6	20:5917880-5931182	690.443	1092.26	288.627	0.264247	-1.92004	0.0146552
ENSG00000227518	MIR1302-10	9:11986-30891	86.3631	136.648	36.0783	0.264024	-1.92126	0.041486
ENSG00000139211	AMIGO2	12:47469489-47630443	1418.71	2246.38	591.048	0.263111	-1.92625	0.0128822
ENSG00000198538	ZNF28	19:53300661-53324922	198.806	314.844	82.7679	0.262886	-1.92749	0.022414
ENSG00000132906	CASP9	1:15783222-15853029	268.067	424.716	111.418	0.262336	-1.93051	0.0191065
ENSG00000146648	EGFR	7:55086713-55324313	2192.87	3475.29	910.447	0.261978	-1.93248	0.012143
ENSG00000140450	ARRDC4	15:98462783-98517068	150.87	239.134	62.6065	0.261806	-1.93343	0.0261025
ENSG00000106823	ECM2	9:95059639-95432547	213.923	339.773	88.0736	0.259213	-1.94779	0.0202902
ENSG00000173442	EHBP1L1	11:65343508-65360121	736.119	1169.82	302.421	0.25852	-1.95165	0.013028
ENSG00000253669	KB-1732A1.1.1	8:103817744-103822199	85.3709	135.725	35.0172	0.258002	-1.95455	0.0387342
ENSG00000253276	CCDC71L	7:106012696-106372895	254.197	404.404	103.99	0.257145	-1.95934	0.0179464
ENSG00000189042	ZNF567	19:37178529-37214248	101.48	161.577	41.384	0.256126	-1.96508	0.032441
ENSG00000184208	C22orf46	22:41956766-42094140	169.288	269.602	68.9733	0.255833	-1.96672	0.0220537
ENSG00000147124	ZNF41	X:47305277-47342345	315.796	503.196	128.396	0.255162	-1.97052	0.0157345
ENSG00000185716	C16orf52	16:22018958-22103552	253.205	403.48	102.929	0.255104	-1.97084	0.0173632
ENSG00000167562	ZNF701	19:53030904-53090427	128.483	204.972	51.9952	0.25367	-1.97897	0.0258731
ENSG00000177352	CCDC71	3:49199967-49203754	112.836	180.043	45.6285	0.253431	-1.98033	0.0285648
ENSG00000132692	BCAN	1:156611181-156631216	73.4851	117.259	29.7116	0.253385	-1.9806	0.0419799
ENSG00000213762	ZNF134	19:58125618-58134721	126.106	201.279	50.9341	0.253053	-1.98249	0.0260008
ENSG00000101849	TBL1X	X:9431334-9687780	1550.25	2474.43	626.065	0.253014	-1.98271	0.0105156
ENSG00000154642	C21orf91	21:19135631-19639690	126.568	202.202	50.9341	0.251897	-1.98909	0.0254736
ENSG00000163249	CCNYL1	2:208576263-208626563	266.407	425.639	107.174	0.251795	-1.98968	0.0159926
ENSG00000196935	SRGAP1	12:64238072-64541637	907.763	1450.5	365.028	0.251657	-1.99047	0.010997
ENSG00000184886	PIGW	17:34842478-34895150	227.056	362.855	91.257	0.251497	-1.99139	0.017256
ENSG00000244627	RP3-449O17.1.1	22:38686696-38794934	63.5148	101.563	25.4671	0.250752	-1.99566	0.0470055
ENSG00000142627	EPHA2	1:16450831-16483824	2191.65	3505.75	877.552	0.250318	-1.99817	0.00966599
ENSG00000133401	PDZD2	5:31639516-32122047	644.981	1033.17	256.793	0.248549	-2.0084	0.0110846
ENSG00000170006	TMEM154	4:153539783-153601317	80.086	128.338	31.8338	0.248047	-2.01132	0.0359585
ENSG00000256087	ZNF432	19:52536360-52552106	99.9576	160.653	39.2617	0.244388	-2.03276	0.0277109
ENSG00000197782	ZNF780A	19:40570427-40596845	178.59	287.145	70.0344	0.243899	-2.03564	0.0174661
ENSG00000257167	RP11-181C3.2.1	12:98906750-98944157	70.5774	113.565	27.5893	0.242938	-2.04134	0.038094
ENSG00000140519	RHCG	15:89998679-90039844	98.5037	158.807	38.2006	0.240547	-2.05561	0.0265023
ENSG00000173480	ZNF417	19:58417141-58427978	150.594	242.827	58.362	0.240344	-2.05683	0.0185191
ENSG00000125740	FOSB	19:45882891-45982086	173.305	279.759	66.851	0.23896	-2.06516	0.0163505
ENSG00000196083	IL1RAP	3:190231839-190375843	751.911	1214.13	289.688	0.238596	-2.06736	0.00875967
ENSG00000102287	GABRE	X:151121595-151143152	2273.69	3671.95	875.43	0.23841	-2.06848	0.00751361
ENSG00000250067	YJEFN3	19:19623229-19648393	179.444	289.915	68.9733	0.237909	-2.07152	0.0156717
ENSG00000116285	ERRFI1	1:8064463-8086368	2727.64	4406.89	1048.39	0.237899	-2.07158	0.00733622
ENSG00000176678	FOXL1	16:86612114-86615303	265.139	428.409	101.868	0.237783	-2.07229	0.0123982
ENSG00000128000	ZNF780B	19:40502942-40562116	52.5523	84.9432	20.1614	0.237352	-2.0749	0.0489593
ENSG00000116852	KIF21B	1:200938519-200992828	364.959	590.909	139.008	0.235244	-2.08777	0.0101822
ENSG00000162086	ZNF75A	16:3313799-3368574	75.2628	121.875	28.6504	0.23508	-2.08877	0.0319266
ENSG00000213020	ZNF611	19:53206065-53238307	97.9732	158.807	37.1395	0.233866	-2.09625	0.0240169
ENSG00000177311	ZBTB38	3:140947567-141168634	1276.35	2070.95	481.752	0.232623	-2.10393	0.00702888
ENSG00000111859	NEDD9	6:11173684-11382581	98.4348	159.73	37.1395	0.232514	-2.10461	0.0234018
ENSG00000110888	CAPRIN2	12:30862485-30907885	1771.3	2875.14	667.449	0.232145	-2.1069	0.0066913
ENSG00000178607	ERN1	17:62120389-62207502	346.403	562.287	130.519	0.232121	-2.10705	0.00977059
ENSG00000115009	CCL20	2:228678557-228682272	714.062	1159.66	268.465	0.231503	-2.11089	0.00762179
ENSG00000174705	SH3PXD2B	5:171752184-171881527	1640.57	2664.63	616.515	0.23137	-2.11173	0.00662911
ENSG00000154319	FAM167A	8:11197145-11332224	96.0577	156.037	36.0783	0.231217	-2.11268	0.0234754
ENSG00000246859	CTC-426B10.1.1	5:110831730-111353006	122.069	198.509	45.6285	0.229856	-2.1212	0.0183582
ENSG00000196793	ZNF239	10:44051791-44070066	53.9373	87.7131	20.1614	0.229856	-2.1212	0.0432109
ENSG00000168685	IL7R	5:35852796-35879705	694.515	1130.11	258.915	0.229105	-2.12592	0.00728153
ENSG00000204186	ZDBF2	2:207139386-207179148	399.279	650	148.558	0.22855	-2.12942	0.00855723
ENSG00000165494	PCF11	11:82868029-82898493	834.47	1359.09	309.849	0.227983	-2.133	0.0068152
ENSG00000181830	SLC35C1	11:45825622-45834566	204.325	333.31	75.3401	0.226036	-2.14537	0.0115067
ENSG00000174173	RG9MTD1	3:101280705-101285290	219.442	358.239	80.6457	0.225117	-2.15125	0.0107911
ENSG00000057294	PKP2	12:32943678-33049774	104.505	170.81	38.2006	0.223644	-2.16072	0.0190778
ENSG00000126882	FAM78A	9:134133462-134151934	200.956	328.693	73.2178	0.222754	-2.16648	0.010905
ENSG00000228492	RAB11FIP1P1	X:73422668-73424477	153.158	251.136	55.1786	0.219716	-2.18629	0.0125883
ENSG00000102053	ZC3H12B	X:64708614-64727767	77.0404	126.492	27.5893	0.218112	-2.19686	0.0240731
ENSG00000110900	TSPAN11	12:31079361-31149534	112.953	185.582	40.3228	0.217277	-2.20239	0.0158103
ENSG00000075407	ZNF37A	10:38383263-38412276	586.482	963.921	209.042	0.216866	-2.20512	0.00577753
ENSG00000169429	IL8	4:74606222-74609433	5759.78	9468.4	2051.16	0.216632	-2.20668	0.00430782
ENSG00000164252	AGGF1	5:76325075-76361059	411.537	677.699	145.374	0.214512	-2.22087	0.00620292
ENSG00000139318	DUSP6	12:89741049-89747048	1301.22	2142.97	459.468	0.214407	-2.22157	0.00458071
ENSG00000232063	RP11-307E17.8.1	9:97094757-97123230	90.2422	148.651	31.8338	0.214152	-2.22329	0.0188864
ENSG00000124217	MOCS3	20:49575362-49577820	81.7258	134.801	28.6504	0.212538	-2.2342	0.0205393
ENSG00000229953	RP11-284F21.7.1	1:156611181-156631216	57.6305	95.0995	20.1614	0.212003	-2.23784	0.0311333
ENSG00000196074	SYCP2	20:58438620-58508710	78.887	130.185	27.5893	0.211924	-2.23838	0.0211787
ENSG00000164506	STXBP5	6:147163701-147708707	326.373	539.205	113.541	0.210571	-2.24762	0.00630059
ENSG00000205413	SAMD9	7:92728828-92747336	153.02	252.983	53.0564	0.209723	-2.25344	0.0103368
ENSG00000166266	CUL5	11:107879458-108018503	224.775	372.088	77.4623	0.208183	-2.26408	0.0074402
ENSG00000143384	MCL1	1:150547031-150552073	21209.4	35134.2	7284.64	0.207338	-2.26995	0.00330165
ENSG00000140987	ZNF434	16:3432084-3451030	152.489	252.983	51.9952	0.205529	-2.28259	0.00950772
ENSG00000183647	ZNF530	19:58111252-58119637	53.3378	88.6364	18.0392	0.203519	-2.29677	0.0303805
ENSG00000137801	THBS1	15:39873279-39891667	872.077	1452.34	291.81	0.200923	-2.31528	0.00349549
ENSG00000231025	RP11-175O19.4.1	10:98752206-98755716	60.4003	100.639	20.1614	0.200334	-2.31952	0.0244715
ENSG00000260766	RP11-226L15.5.1	1:159994742-159996584	60.4003	100.639	20.1614	0.200334	-2.31952	0.0244715
ENSG00000008405	CRY1	12:107385141-107517092	307.149	512.429	101.868	0.198795	-2.33065	0.00491702
ENSG00000105136	ZNF419	19:57980953-58006048	73.6021	122.798	24.4059	0.198748	-2.33099	0.0183992
ENSG00000256294	ZNF225	19:44617547-44637255	44.8214	74.787	14.8558	0.198641	-2.33176	0.0359832
ENSG00000084090	STARD7	2:96850596-96908359	1861.24	3105.97	616.515	0.198494	-2.33283	0.00288309
ENSG00000137275	RIPK1	6:3064091-3115421	301.795	505.966	97.6237	0.192945	-2.37374	0.00428929
ENSG00000256771	ZNF253	19:19976713-20004292	85.3501	143.111	27.5893	0.192783	-2.37495	0.01367
ENSG00000184675	FAM123B	X:63404996-63425624	187.202	313.921	60.4843	0.192674	-2.37577	0.00598494
ENSG00000214654	RP11-27I1.4.1	9:123555828-123561848	95.2514	159.73	30.7727	0.192654	-2.37591	0.0119179
ENSG00000141639	MAPK4	18:48086483-48258196	36.305	60.9375	11.6724	0.191547	-2.38423	0.0442879
ENSG00000101255	TRIB3	20:361260-378203	1937.83	3252.77	622.882	0.191493	-2.38464	0.00235328
ENSG00000171617	ENC1	5:73923233-74072737	195.188	327.77	62.6065	0.191007	-2.3883	0.0055555
ENSG00000223414	LINC00473	6:166193756-166401527	217.299	365.625	68.9733	0.188645	-2.40626	0.00481229
ENSG00000145416	MARCH1	4:164445449-165305202	50.8917	85.8665	15.9169	0.185368	-2.43154	0.0244552
ENSG00000136869	TLR4	9:120466609-120479149	886.809	1496.66	276.954	0.185048	-2.43403	0.0022327
ENSG00000257671	RP3-416H24.1.1	12:52626303-52715182	251.62	424.716	78.5234	0.184885	-2.4353	0.00391862
ENSG00000250899	RP11-253E3.3.1	12:3150602-3154116	156.437	264.063	48.8119	0.18485	-2.43558	0.00583985
ENSG00000112308	C6orf62	6:24667262-24721064	1907.87	3220.46	595.293	0.184847	-2.43559	0.00193527
ENSG00000010539	ZNF200	16:3272324-3285456	217.161	367.472	66.851	0.181922	-2.45861	0.00405346
ENSG00000102870	ZNF629	16:30789777-30798523	269.438	456.108	82.7679	0.181466	-2.46223	0.0034085
ENSG00000130714	POMT1	9:134378288-134406655	72.541	122.798	22.2837	0.181466	-2.46223	0.0136278
ENSG00000234420	ZNF37BP	10:43015072-43048270	131.419	222.514	40.3228	0.181215	-2.46423	0.00641435
ENSG00000174343	CHRNA9	4:40337345-40357234	48.5146	82.1733	14.8558	0.180786	-2.46765	0.0243887
ENSG00000170100	ZNF778	16:89284117-89302402	65.9401	111.719	20.1614	0.180466	-2.4702	0.0153199
ENSG00000182585	EPGN	4:75174189-75181024	331.017	562.287	99.746	0.177393	-2.49498	0.00266147
ENSG00000115993	TRAK2	2:202241929-202345574	417.614	710.015	125.213	0.176353	-2.50346	0.00226926
ENSG00000130487	KLHDC7B	22:50986461-50989451	68.2484	116.335	20.1614	0.173304	-2.52862	0.0126691
ENSG00000204604	ZNF468	19:53341785-53360902	188.704	322.23	55.1786	0.17124	-2.54591	0.00343872
ENSG00000189057	FAM111B	11:58874657-58894883	488.425	834.66	142.191	0.170358	-2.55336	0.00175079
ENSG00000126500	FLRT1	11:63742078-63933578	32.9356	56.3211	9.55015	0.169566	-2.56008	0.0380995
ENSG00000164938	TP53INP1	8:95825538-96128683	29.6351	50.7813	8.48902	0.167168	-2.58063	0.0438474
ENSG00000186814	ZSCAN30	18:32820993-32870196	93.1292	159.73	26.5282	0.166081	-2.59004	0.00688978
ENSG00000180626	ZNF594	17:5082829-5095178	195.168	335.156	55.1786	0.164635	-2.60265	0.00276383
ENSG00000186594	MIR22HG	17:1614804-1619504	206.915	355.469	58.362	0.164183	-2.60662	0.00258194
ENSG00000196247	ZNF107	7:64126500-64171404	131.673	226.208	37.1395	0.164183	-2.60662	0.00417632
ENSG00000179046	TRIML2	4:189012426-189030757	105.339	180.966	29.7116	0.164183	-2.60662	0.00555422
ENSG00000197971	MBP	18:74690782-74845639	309.415	531.818	87.0125	0.163613	-2.61164	0.0018357
ENSG00000254166	RP11-255B23.4.1	8:128197879-128215467	94.9758	163.423	26.5282	0.162328	-2.62302	0.00612295
ENSG00000185495	RP11-504P24.4.1	1:224102740-226595780	45.6068	78.4802	12.7335	0.162252	-2.6237	0.0196054
ENSG00000134294	SLC38A2	12:46751971-46767561	17583.1	30270.3	4896.04	0.161744	-2.62821	0.000792598
ENSG00000166750	SLFN5	17:33570085-33594739	625.756	1077.49	174.025	0.16151	-2.6303	0.0011768
ENSG00000197935	ZNF311	6:28962561-28973387	46.0685	79.4035	12.7335	0.160365	-2.64057	0.0186227
ENSG00000255414	AP000783.2.1	11:123325105-123331118	61.5785	106.179	16.978	0.1599	-2.64476	0.0113043
ENSG00000196182	STK40	1:36805224-36851497	317.263	547.514	87.0125	0.158923	-2.6536	0.00155124
ENSG00000174502	SLC26A9	1:205882175-205912588	70.026	120.952	19.1003	0.157917	-2.66277	0.00877569
ENSG00000139289	PHLDA1	12:76419226-76427712	2228.09	3849.22	606.965	0.157685	-2.66488	0.000760051
ENSG00000114019	AMOTL2	3:134070693-134094321	1263.7	2183.59	343.805	0.157449	-2.66704	0.000827302
ENSG00000168906	MAT2A	2:85766287-85772403	10708.1	18513	2903.24	0.156822	-2.6728	0.000665514
ENSG00000261326	RP5-1057J7.6.1	1:23607801-23613245	78.4735	135.725	21.2226	0.156365	-2.67701	0.00705783
ENSG00000230439	RP11-488P3.1.1	1:94027346-94312706	298.846	517.046	80.6457	0.155974	-2.68062	0.00146934
ENSG00000198142	ANKRD57	2:110371910-110376563	2524.47	4370.88	678.06	0.155131	-2.68844	0.000679952
ENSG00000260359	RP11-4F5.2.1	15:95024039-95027181	47.9151	83.0966	12.7335	0.153238	-2.70616	0.0151906
ENSG00000178295	GEN1	2:17845078-17981509	410.048	711.861	108.235	0.152045	-2.71743	0.00103803
ENSG00000254945	RP11-556O5.3.1	8:8086116-8102387	28.1813	48.9347	7.42789	0.151792	-2.71983	0.0384728
ENSG00000136870	ZNF189	9:104161154-104172942	167.172	290.838	43.5062	0.149589	-2.74092	0.00206323
ENSG00000258441	CTD-2552B11.4.1	14:21668237-21675059	320.219	557.671	82.7679	0.148417	-2.75227	0.00107555
ENSG00000124160	NCOA5	20:44689623-44718591	249.732	435.796	63.6677	0.146095	-2.77502	0.00121548
ENSG00000187678	SPRY4	5:141689991-142077617	195.746	341.62	49.873	0.14599	-2.77606	0.00154008
ENSG00000179431	FJX1	11:35639734-35642419	33.3283	58.1676	8.48902	0.145941	-2.77655	0.0258519
ENSG00000120738	EGR1	5:137801168-137805004	6199.65	10825.6	1573.65	0.145363	-2.78226	0.000428872
ENSG00000259758	CTA-204B4.6.1	8:141530254-141539600	1472.77	2574.15	371.395	0.144279	-2.79307	0.000479339
ENSG00000235636	NUS1P1	X:47372000-47372882	50.685	88.6364	12.7335	0.14366	-2.79927	0.0112576
ENSG00000223749	AC004383.4.1	X:133677366-133680741	42.2375	73.8637	10.6113	0.14366	-2.79927	0.0158718
ENSG00000162396	PARS2	1:55222570-55230187	33.79	59.0909	8.48902	0.14366	-2.79927	0.0242306
ENSG00000083817	ZNF416	19:58082934-58090243	59.5941	104.332	14.8558	0.142389	-2.81209	0.00810287
ENSG00000118523	CTGF	6:132269315-132398533	68.5033	120.028	16.978	0.14145	-2.82163	0.00615145
ENSG00000125266	EFNB2	13:107142092-107187462	729.971	1280.61	179.331	0.140035	-2.83614	0.000492195
ENSG00000182141	ZNF708	19:21473962-21512212	82.0978	144.034	20.1614	0.139977	-2.83674	0.00430892
ENSG00000169594	BNC1	15:83776158-84108197	509.874	895.597	124.152	0.138625	-2.85074	0.000549045
ENSG00000128165	ADM2	22:50919984-50924869	183.86	323.154	44.5674	0.137914	-2.85816	0.00125077
ENSG00000136244	IL6	7:22765013-22771621	1897.14	3335.87	458.407	0.137418	-2.86336	0.000341294
ENSG00000127954	STEAP4	7:87861325-87936206	228.406	401.634	55.1786	0.137385	-2.8637	0.000967422
ENSG00000172379	ARNT2	15:80696691-80890278	348.311	614.915	81.7068	0.132875	-2.91186	0.000556096
ENSG00000157933	SKI	1:2160133-2241558	626.458	1110.73	142.191	0.128016	-2.9656	0.000312099
ENSG00000204920	ZNF155	19:44488345-44502477	84.7988	150.497	19.1003	0.126915	-2.97807	0.00278077
ENSG00000164488	DACT2	6:168693511-168720434	297.027	527.202	66.851	0.126803	-2.97933	0.0004929
ENSG00000258602	RP11-7F17.7.1	14:77425980-77432145	38.4065	68.3239	8.48902	0.124247	-3.00872	0.0128812
ENSG00000090612	ZNF268	12:133707160-133783698	140.955	251.136	30.7727	0.122534	-3.02875	0.00101586
ENSG00000171658	RP11-443P15.2.1	3:185677731-185698658	210.243	374.858	45.6285	0.121722	-3.03834	0.000571523
ENSG00000168806	LCMT2	15:43619973-43622803	118.913	212.358	25.4671	0.119925	-3.05979	0.0012088
ENSG00000170961	HAS2	8:122624355-122656933	432.813	776.492	89.1347	0.114792	-3.12291	0.000207412
ENSG00000124459	ZNF45	19:44416775-44439411	136.593	245.597	27.5893	0.112336	-3.15411	0.000713092
ENSG00000132326	PER2	2:239140324-239198743	152.957	275.142	30.7727	0.111843	-3.16045	0.00058223
ENSG00000166189	HPS6	10:103825146-103827792	67.3043	121.875	12.7335	0.10448	-3.2587	0.00215108
ENSG00000149289	ZC3H12C	11:109964086-110042566	841.696	1525.28	158.108	0.103658	-3.2701	7.6057e-05
ENSG00000175592	FOSL1	11:65659489-65668044	844.79	1533.59	155.986	0.101713	-3.29743	6.75119e-05
ENSG00000137033	IL33	9:6215804-6257983	861.719	1598.23	125.213	0.0783451	-3.67401	1.28244e-05
ENSG00000122877	EGR2	10:64571755-64679660	54.4952	101.563	7.42789	0.0731361	-3.77327	0.00112197
ENSG00000128965	CHAC1	15:41245159-41248710	94.5415	176.35	12.7335	0.0722062	-3.79173	0.000223724
ENSG00000118515	SGK1	6:134490383-134639250	1023.57	1917.69	129.458	0.0675072	-3.88882	4.42249e-06
ENSG00000095752	IL11	19:55875756-55881814	211.773	397.017	26.5282	0.0668187	-3.9036	2.43206e-05
ENSG00000167723	TRPV3	17:3343307-3461289	192.638	361.932	23.3448	0.0645005	-3.95455	2.43592e-05
ENSG00000204569	PPP1R10	6:30568176-30594172	971.556	1853.98	89.1347	0.0480775	-4.37849	4.76876e-07
ENSG00000109321	AREG	4:75310850-75320726	1062.06	2027.56	96.5626	0.0476251	-4.39213	4.20199e-07
ENSG00000205595	AREGB	4:75418300-75514664	934.121	1793.96	74.2789	0.0414049	-4.59405	1.80406e-07
ENSG00000119508	NR4A3	9:102584136-102629173	183.109	354.546	11.6724	0.0329221	-4.9248	9.4903e-07

## Sheet: Table B
Table B. Differentially alternative spliced genes
Ensembl	symbol	Splicing-Index	regulation_call
ENSG00000143641	GALNT2	-5.90461	upregulated
ENSG00000152894	PTPRK	-5.59812	upregulated
ENSG00000155111	CDK19	-4.69279	upregulated
ENSG00000249859	PVT1	-4.46702	upregulated
ENSG00000157191	NECAP2	-4.28569	upregulated
ENSG00000182872	RBM10	-4.17856	upregulated
ENSG00000091073	DTX2	-4.00392	upregulated
ENSG00000105939	ZC3HAV1	-3.99209	upregulated
ENSG00000100629	CEP128	-3.89219	upregulated
ENSG00000124151	NCOA3	-3.86478	upregulated
ENSG00000107263	RAPGEF1	-3.71623	upregulated
ENSG00000156642	NPTN	-3.70829	upregulated
ENSG00000185324	CDK10	-3.4593	upregulated
ENSG00000176046	NUPR1	-3.45496	upregulated
ENSG00000251003	RP11-152P17.2	-3.38591	upregulated
ENSG00000162772	ATF3	-3.37581	upregulated
ENSG00000157557	ETS2	-3.35848	upregulated
ENSG00000095787	WAC	-3.3322	upregulated
ENSG00000039560	RAI14	-3.31771	upregulated
ENSG00000106635	BCL7B	-3.30871	upregulated
ENSG00000139842	CUL4A	-3.28094	upregulated
ENSG00000139620	C12orf41	-3.27751	upregulated
ENSG00000171608	PIK3CD	-3.27674	upregulated
ENSG00000186952	TMEM232	-3.25129	upregulated
ENSG00000133247	SUV420H2	-3.25041	upregulated
ENSG00000157881	PANK4	-3.22028	upregulated
ENSG00000183765	CHEK2	-3.15906	upregulated
ENSG00000137996	RTCD1	-3.08721	upregulated
ENSG00000159128	IFNGR2	-3.08062	upregulated
ENSG00000138434	SSFA2	-3.07277	upregulated
ENSG00000174915	PTDSS2	-3.02493	upregulated
ENSG00000076242	MLH1	-3.02413	upregulated
ENSG00000151332	MBIP	-2.9924	upregulated
ENSG00000100376	FAM118A	-2.90307	upregulated
ENSG00000148634	HERC4	-2.8972	upregulated
ENSG00000075702	WDR62	-2.86265	upregulated
ENSG00000059804	SLC2A3	-2.8248	upregulated
ENSG00000101003	GINS1	-2.81388	upregulated
ENSG00000143228	NUF2	-2.7985	upregulated
ENSG00000104856	RELB	-2.79285	upregulated
ENSG00000153922	CHD1	-2.76272	upregulated
ENSG00000000457	SCYL3	-2.74332	upregulated
ENSG00000152556	PFKM	-2.7296	upregulated
ENSG00000134602	MST4	-2.67261	upregulated
ENSG00000160214	RRP1	-2.65226	upregulated
ENSG00000205758	CRYZL1	-2.63743	upregulated
ENSG00000155975	VPS37A	-2.61308	upregulated
ENSG00000103148	NPRL3	-2.60898	upregulated
ENSG00000139722	VPS37B	-2.5877	upregulated
ENSG00000134317	GRHL1	-2.57168	upregulated
ENSG00000180104	EXOC3	-2.55452	upregulated
ENSG00000171634	BPTF	-2.53263	upregulated
ENSG00000119522	DENND1A	-2.50951	upregulated
ENSG00000136146	MED4	-2.49123	upregulated
ENSG00000183621	ZNF438	-2.48646	upregulated
ENSG00000175066	GK5	-2.47674	upregulated
ENSG00000147421	HMBOX1	-2.4754	upregulated
ENSG00000173409	ARV1	-2.47015	upregulated
ENSG00000167996	FTH1	-2.46877	upregulated
ENSG00000067248	DHX29	-2.46059	upregulated
ENSG00000134086	VHL	-2.45436	upregulated
ENSG00000182149	IST1	-2.42283	upregulated
ENSG00000175063	UBE2C	-2.41337	upregulated
ENSG00000139436	GIT2	-2.36651	upregulated
ENSG00000154124	FAM105B	-2.34835	upregulated
ENSG00000130939	UBE4B	-2.34571	upregulated
ENSG00000113391	FAM172A	-2.34196	upregulated
ENSG00000163882	POLR2H	-2.32817	upregulated
ENSG00000083223	ZCCHC6	-2.31681	upregulated
ENSG00000144048	DUSP11	-2.312	upregulated
ENSG00000109184	DCUN1D4	-2.30683	upregulated
ENSG00000163486	SRGAP2	-2.29569	upregulated
ENSG00000012660	ELOVL5	-2.29455	upregulated
ENSG00000106025	TSPAN12	-2.27835	upregulated
ENSG00000175224	ATG13	-2.21687	upregulated
ENSG00000116747	TROVE2	-2.19477	upregulated
ENSG00000111203	ITFG2	-2.19273	upregulated
ENSG00000103168	TAF1C	-2.16652	upregulated
ENSG00000136444	RSAD1	-2.15282	upregulated
ENSG00000204084	INPP5B	-2.15114	upregulated
ENSG00000117625	RCOR3	-2.14678	upregulated
ENSG00000156931	VPS8	-2.11979	upregulated
ENSG00000131446	MGAT1	-2.11276	upregulated
ENSG00000160298	C21orf58	-2.10554	upregulated
ENSG00000257433	RP1-197B17.3	-2.10373	upregulated
ENSG00000140395	WDR61	-2.10349	upregulated
ENSG00000185480	C12orf48	-2.09403	upregulated
ENSG00000090857	PDPR	-2.09303	upregulated
ENSG00000138246	DNAJC13	-2.08122	upregulated
ENSG00000187741	FANCA	-2.07905	upregulated
ENSG00000029639	TFB1M	-2.06096	upregulated
ENSG00000116750	UCHL5	-2.05308	upregulated
ENSG00000141867	BRD4	-2.03059	upregulated
ENSG00000060237	WNK1	-2.01064	upregulated
ENSG00000204852	TCTN1	-1.96638	upregulated
ENSG00000114982	KIAA1310	-1.9579	upregulated
ENSG00000143398	PIP5K1A	-1.95147	upregulated
ENSG00000150540	HNMT	-1.94445	upregulated
ENSG00000124789	NUP153	-1.93029	upregulated
ENSG00000174227	PIGG	-1.92517	upregulated
ENSG00000112081	SRSF3	-1.91811	upregulated
ENSG00000074603	DPP8	-1.90213	upregulated
ENSG00000125885	MCM8	-1.89579	upregulated
ENSG00000155096	AZIN1	-1.89545	upregulated
ENSG00000119772	DNMT3A	-1.89515	upregulated
ENSG00000144713	RPL32	-1.89436	upregulated
ENSG00000180376	CCDC66	-1.87927	upregulated
ENSG00000177853	ZNF518A	-1.86213	upregulated
ENSG00000154380	ENAH	-1.86017	upregulated
ENSG00000133641	C12orf29	-1.85811	upregulated
ENSG00000112282	MED23	-1.84953	upregulated
ENSG00000168395	ING5	-1.84241	upregulated
ENSG00000110031	LPXN	-1.84142	upregulated
ENSG00000165671	NSD1	-1.84048	upregulated
ENSG00000119720	C14orf102	-1.82819	upregulated
ENSG00000163812	ZDHHC3	-1.82372	upregulated
ENSG00000022277	C20orf43	-1.82331	upregulated
ENSG00000100462	PRMT5	-1.82184	upregulated
ENSG00000140043	PTGR2	-1.81201	upregulated
ENSG00000185499	MUC1	-1.79891	upregulated
ENSG00000133943	C14orf159	-1.79173	upregulated
ENSG00000100483	METTL21D	-1.78397	upregulated
ENSG00000023734	STRAP	-1.78157	upregulated
ENSG00000145425	RPS3A	-1.76818	upregulated
ENSG00000132781	MUTYH	-1.76067	upregulated
ENSG00000123219	CENPK	-1.75728	upregulated
ENSG00000213928	IRF9	-1.74559	upregulated
ENSG00000173436	MINOS1	-1.70968	upregulated
ENSG00000243628	RP11-18I14.7	-1.70928	upregulated
ENSG00000198964	SGMS1	-1.7081	upregulated
ENSG00000114503	NCBP2	-1.70417	upregulated
ENSG00000008838	MED24	-1.6877	upregulated
ENSG00000163644	PPM1K	-1.67543	upregulated
ENSG00000157020	SEC13	-1.67407	upregulated
ENSG00000122515	ZMIZ2	-1.66825	upregulated
ENSG00000173486	FKBP2	-1.66075	upregulated
ENSG00000101294	HM13	-1.65482	upregulated
ENSG00000119335	SET	-1.64764	upregulated
ENSG00000158864	NDUFS2	-1.63004	upregulated
ENSG00000105856	HBP1	-1.62904	upregulated
ENSG00000139531	SUOX	-1.62683	upregulated
ENSG00000144524	COPS7B	-1.62024	upregulated
ENSG00000108474	PIGL	-1.6159	upregulated
ENSG00000065923	SLC9A7	-1.59994	upregulated
ENSG00000188846	RPL14	-1.59518	upregulated
ENSG00000140416	TPM1	-1.58815	upregulated
ENSG00000196154	S100A4	-1.58639	upregulated
ENSG00000157978	LDLRAP1	-1.57966	upregulated
ENSG00000183624	C3orf37	-1.57904	upregulated
ENSG00000243452	NBPF15	-1.57307	upregulated
ENSG00000105974	CAV1	-1.56962	upregulated
ENSG00000136560	TANK	-1.56217	upregulated
ENSG00000120963	ZNF706	-1.55422	upregulated
ENSG00000215114	UBXN2B	-1.55048	upregulated
ENSG00000152117	AC093838.4	-1.54936	upregulated
ENSG00000122912	SLC25A16	-1.54781	upregulated
ENSG00000130921	C12orf65	-1.54358	upregulated
ENSG00000179151	EDC3	-1.53724	upregulated
ENSG00000108264	TADA2A	-1.53168	upregulated
ENSG00000105705	SUGP1	-1.51754	upregulated
ENSG00000233024	RP11-1212A22.4	-1.50949	upregulated
ENSG00000116212	LRRC42	-1.50944	upregulated
ENSG00000167645	YIF1B	-1.50579	upregulated
ENSG00000063046	EIF4B	-1.50108	upregulated
ENSG00000173575	CHD2	-1.49921	upregulated
ENSG00000181555	SETD2	-1.46958	upregulated
ENSG00000116497	S100PBP	-1.46883	upregulated
ENSG00000112983	BRD8	-1.46004	upregulated
ENSG00000110906	KCTD10	-1.45811	upregulated
ENSG00000187109	NAP1L1	-1.45633	upregulated
ENSG00000144645	OSBPL10	-1.45469	upregulated
ENSG00000166532	RIMKLB	-1.45336	upregulated
ENSG00000069424	KCNAB2	-1.43323	upregulated
ENSG00000167985	SDHAF2	-1.42431	upregulated
ENSG00000068305	MEF2A	-1.42283	upregulated
ENSG00000197568	HHLA3	-1.41995	upregulated
ENSG00000162585	C1orf86	-1.4125	upregulated
ENSG00000106086	PLEKHA8	-1.4085	upregulated
ENSG00000100503	NIN	-1.40657	upregulated
ENSG00000168614	NBPF9	-1.40596	upregulated
ENSG00000006432	MAP3K9	-1.40213	upregulated
ENSG00000135953	MFSD9	-1.38553	upregulated
ENSG00000161010	C5orf45	-1.37621	upregulated
ENSG00000011021	CLCN6	-1.37444	upregulated
ENSG00000105982	RNF32	-1.37369	upregulated
ENSG00000126787	DLGAP5	-1.37329	upregulated
ENSG00000152061	RABGAP1L	-1.3725	upregulated
ENSG00000120742	SERP1	-1.37053	upregulated
ENSG00000196187	TMEM63A	-1.36906	upregulated
ENSG00000157470	FAM81A	-1.35923	upregulated
ENSG00000099381	SETD1A	-1.35629	upregulated
ENSG00000159063	ALG8	-1.35155	upregulated
ENSG00000172113	NME6	-1.34991	upregulated
ENSG00000077458	FAM76B	-1.34699	upregulated
ENSG00000153094	BCL2L11	-1.3387	upregulated
ENSG00000162910	MRPL55	-1.3317	upregulated
ENSG00000138785	INTS12	-1.33079	upregulated
ENSG00000142046	TMEM91	-1.32161	upregulated
ENSG00000143569	UBAP2L	-1.32115	upregulated
ENSG00000147535	PPAPDC1B	-1.32092	upregulated
ENSG00000153406	NMRAL1	-1.31624	upregulated
ENSG00000152147	GEMIN6	-1.3103	upregulated
ENSG00000134644	PUM1	-1.29489	upregulated
ENSG00000151718	WWC2	-1.28854	upregulated
ENSG00000114650	SCAP	-1.28705	upregulated
ENSG00000185215	TNFAIP2	-1.28468	upregulated
ENSG00000229043	AC091729.9	-1.28446	upregulated
ENSG00000196118	C16orf93	-1.28426	upregulated
ENSG00000166012	TAF1D	-1.28339	upregulated
ENSG00000169398	PTK2	-1.27536	upregulated
ENSG00000204628	GNB2L1	-1.27385	upregulated
ENSG00000011295	TTC19	-1.2688	upregulated
ENSG00000076685	NT5C2	-1.26004	upregulated
ENSG00000025770	NCAPH2	-1.25981	upregulated
ENSG00000167535	CACNB3	-1.25774	upregulated
ENSG00000165195	PIGA	-1.25256	upregulated
ENSG00000162928	PEX13	-1.25187	upregulated
ENSG00000169045	HNRNPH1	-1.25032	upregulated
ENSG00000143379	SETDB1	-1.24529	upregulated
ENSG00000163479	SSR2	-1.24392	upregulated
ENSG00000168297	PXK	-1.24034	upregulated
ENSG00000111802	TDP2	-1.23985	upregulated
ENSG00000128159	TUBGCP6	-1.23112	upregulated
ENSG00000221978	CCNL2	-1.22851	upregulated
ENSG00000140988	RPS2	-1.22224	upregulated
ENSG00000119943	PYROXD2	-1.22058	upregulated
ENSG00000104432	IL7	-1.21622	upregulated
ENSG00000075151	EIF4G3	-1.21427	upregulated
ENSG00000145901	TNIP1	-1.20829	upregulated
ENSG00000135127	CCDC64	-1.20622	upregulated
ENSG00000132640	BTBD3	-1.20304	upregulated
ENSG00000120699	EXOSC8	-1.1973	upregulated
ENSG00000170312	CDK1	-1.18723	upregulated
ENSG00000104164	PLDN	-1.18652	upregulated
ENSG00000204261	XXbac-BPG246D15.8	-1.18222	upregulated
ENSG00000121753	BAI2	-1.18017	upregulated
ENSG00000090975	PITPNM2	-1.17821	upregulated
ENSG00000142188	TMEM50B	-1.17711	upregulated
ENSG00000068745	IP6K2	-1.17163	upregulated
ENSG00000249915	PDCD6	-1.17135	upregulated
ENSG00000244005	NFS1	-1.16949	upregulated
ENSG00000213742	RP4-694B14.5	-1.16939	upregulated
ENSG00000109180	OCIAD1	-1.16799	upregulated
ENSG00000168917	TMEM22	-1.16056	upregulated
ENSG00000146416	AIG1	-1.15892	upregulated
ENSG00000124356	STAMBP	-1.1473	upregulated
ENSG00000007341	ST7L	-1.14601	upregulated
ENSG00000100519	PSMC6	-1.14448	upregulated
ENSG00000215837	SDHAP2	-1.14235	upregulated
ENSG00000140995	DEF8	-1.14086	upregulated
ENSG00000167785	ZNF558	-1.14021	upregulated
ENSG00000110200	C11orf51	-1.13929	upregulated
ENSG00000185379	RAD51D	-1.13616	upregulated
ENSG00000160752	FDPS	-1.12775	upregulated
ENSG00000119979	FAM45A	-1.12447	upregulated
ENSG00000235531	RP11-383H13.1	-1.11953	upregulated
ENSG00000109790	KLHL5	-1.11374	upregulated
ENSG00000173818	ENDOV	-1.11335	upregulated
ENSG00000132600	PRMT7	-1.11146	upregulated
ENSG00000089053	ANAPC5	-1.11032	upregulated
ENSG00000130414	NDUFA10	-1.10757	upregulated
ENSG00000112759	SLC29A1	-1.10681	upregulated
ENSG00000198431	TXNRD1	-1.10638	upregulated
ENSG00000139178	C1RL	-1.09959	upregulated
ENSG00000163939	PBRM1	-1.0844	upregulated
ENSG00000115762	PLEKHB2	-1.08245	upregulated
ENSG00000196776	CD47	-1.07889	upregulated
ENSG00000176393	RNPEP	-1.07109	upregulated
ENSG00000125967	NECAB3	-1.06961	upregulated
ENSG00000197275	RAD54B	-1.06668	upregulated
ENSG00000178222	RNF212	-1.06387	upregulated
ENSG00000106615	RHEB	-1.06267	upregulated
ENSG00000135541	AHI1	-1.06242	upregulated
ENSG00000170473	WIBG	-1.06072	upregulated
ENSG00000150093	ITGB1	-1.05828	upregulated
ENSG00000127022	CANX	-1.05423	upregulated
ENSG00000100099	HPS4	-1.05123	upregulated
ENSG00000181938	GINS3	-1.04918	upregulated
ENSG00000156042	TTC18	-1.04833	upregulated
ENSG00000112787	FBRSL1	-1.04802	upregulated
ENSG00000160908	ZNF394	-1.04733	upregulated
ENSG00000231721	AC058791.2	-1.04602	upregulated
ENSG00000070814	TCOF1	-1.04526	upregulated
ENSG00000078699	CBFA2T2	-1.04135	upregulated
ENSG00000187522	HSPA14	-1.04082	upregulated
ENSG00000164808	KIAA0146	-1.03585	upregulated
ENSG00000118495	PLAGL1	-1.03383	upregulated
ENSG00000176261	ZBTB8OS	-1.0275	upregulated
ENSG00000124588	NQO2	-1.02261	upregulated
ENSG00000103404	USP31	-1.02132	upregulated
ENSG00000013573	DDX11	-1.01755	upregulated
ENSG00000185842	DNAH14	-1.0175	upregulated
ENSG00000070831	CDC42	-1.01732	upregulated
ENSG00000128487	SPECC1	-1.01549	upregulated
ENSG00000176155	CCDC57	-1.01258	upregulated
ENSG00000182518	FAM104B	-1.01145	upregulated
ENSG00000185485	SDHAP1	-1.01082	upregulated
ENSG00000147586	MRPS28	-1.00988	upregulated
ENSG00000166451	CENPN	-1.00767	upregulated
ENSG00000225241	NBPF8	-1.00753	upregulated
ENSG00000100813	ACIN1	-1.00572	upregulated
ENSG00000182903	ZNF721	-1.00436	upregulated
ENSG00000113638	TTC33	1.00072	downregulated
ENSG00000138688	KIAA1109	1.00084	downregulated
ENSG00000062598	ELMO2	1.0031	downregulated
ENSG00000145919	BOD1	1.0036	downregulated
ENSG00000169764	UGP2	1.00567	downregulated
ENSG00000167110	GOLGA2	1.00621	downregulated
ENSG00000182718	ANXA2	1.00623	downregulated
ENSG00000133026	MYH10	1.00667	downregulated
ENSG00000198157	HMGN5	1.00721	downregulated
ENSG00000092931	MFSD11	1.0102	downregulated
ENSG00000135597	REPS1	1.01078	downregulated
ENSG00000130511	SSBP4	1.01111	downregulated
ENSG00000100241	SBF1	1.01139	downregulated
ENSG00000165490	C11orf82	1.01199	downregulated
ENSG00000138468	SENP7	1.01341	downregulated
ENSG00000121067	SPOP	1.01517	downregulated
ENSG00000163867	ZMYM6	1.01565	downregulated
ENSG00000180776	ZDHHC20	1.01571	downregulated
ENSG00000176124	DLEU1	1.01602	downregulated
ENSG00000110514	MADD	1.0173	downregulated
ENSG00000138092	CENPO	1.018	downregulated
ENSG00000115825	PRKD3	1.02081	downregulated
ENSG00000110841	PPFIBP1	1.02213	downregulated
ENSG00000257923	CUX1	1.02219	downregulated
ENSG00000151665	PIGF	1.02415	downregulated
ENSG00000079387	SENP1	1.02434	downregulated
ENSG00000048991	R3HDM1	1.02682	downregulated
ENSG00000143537	ADAM15	1.02902	downregulated
ENSG00000197619	ZNF615	1.02939	downregulated
ENSG00000162994	C2orf63	1.02981	downregulated
ENSG00000114346	ECT2	1.03001	downregulated
ENSG00000105676	ARMC6	1.03212	downregulated
ENSG00000114861	FOXP1	1.03525	downregulated
ENSG00000137944	CCBL2	1.03531	downregulated
ENSG00000188566	NDOR1	1.03667	downregulated
ENSG00000138757	G3BP2	1.03837	downregulated
ENSG00000197323	TRIM33	1.03974	downregulated
ENSG00000170485	NPAS2	1.04024	downregulated
ENSG00000131023	LATS1	1.0418	downregulated
ENSG00000100206	DMC1	1.04246	downregulated
ENSG00000109381	ELF2	1.0458	downregulated
ENSG00000197385	ZNF860	1.05022	downregulated
ENSG00000085978	ATG16L1	1.05089	downregulated
ENSG00000163710	PCOLCE2	1.05127	downregulated
ENSG00000138744	NAAA	1.05131	downregulated
ENSG00000163681	SLMAP	1.05461	downregulated
ENSG00000152620	NADKD1	1.05729	downregulated
ENSG00000002016	RAD52	1.05862	downregulated
ENSG00000083168	KAT6A	1.06301	downregulated
ENSG00000159199	ATP5G1	1.06392	downregulated
ENSG00000106608	URGCP	1.0668	downregulated
ENSG00000179195	ZNF664	1.06791	downregulated
ENSG00000178719	GRINA	1.06835	downregulated
ENSG00000114735	HEMK1	1.06847	downregulated
ENSG00000165219	GAPVD1	1.06894	downregulated
ENSG00000163257	DCAF16	1.06897	downregulated
ENSG00000131263	RLIM	1.0724	downregulated
ENSG00000080822	CLDND1	1.07307	downregulated
ENSG00000115459	ELMOD3	1.07999	downregulated
ENSG00000123983	ACSL3	1.08567	downregulated
ENSG00000160886	LY6K	1.08698	downregulated
ENSG00000189171	S100A13	1.08773	downregulated
ENSG00000119185	ITGB1BP1	1.08799	downregulated
ENSG00000090487	SPG21	1.08906	downregulated
ENSG00000133104	SPG20	1.08976	downregulated
ENSG00000152133	CCDC75	1.0913	downregulated
ENSG00000205423	TMEM188	1.09761	downregulated
ENSG00000156304	SCAF4	1.09986	downregulated
ENSG00000155755	TMEM237	1.10044	downregulated
ENSG00000086200	IPO11	1.10188	downregulated
ENSG00000221955	SLC12A8	1.10252	downregulated
ENSG00000159147	DONSON	1.10344	downregulated
ENSG00000145216	FIP1L1	1.10646	downregulated
ENSG00000183283	DAZAP2	1.10652	downregulated
ENSG00000132716	DCAF8	1.10977	downregulated
ENSG00000135679	MDM2	1.1104	downregulated
ENSG00000100296	THOC5	1.11445	downregulated
ENSG00000088832	FKBP1A	1.11585	downregulated
ENSG00000179950	PUF60	1.1166	downregulated
ENSG00000137074	APTX	1.11739	downregulated
ENSG00000064726	BTBD1	1.11758	downregulated
ENSG00000082805	ERC1	1.11821	downregulated
ENSG00000148950	IMMP1L	1.12668	downregulated
ENSG00000160124	CCDC58	1.12707	downregulated
ENSG00000076928	ARHGEF1	1.12746	downregulated
ENSG00000163517	HDAC11	1.12774	downregulated
ENSG00000087470	DNM1L	1.1358	downregulated
ENSG00000183474	GTF2H2C	1.13793	downregulated
ENSG00000185728	YTHDF3	1.13931	downregulated
ENSG00000186908	ZDHHC17	1.13994	downregulated
ENSG00000054267	ARID4B	1.14151	downregulated
ENSG00000244754	N4BP2L2	1.14188	downregulated
ENSG00000138190	EXOC6	1.15126	downregulated
ENSG00000172046	USP19	1.15369	downregulated
ENSG00000143498	TAF1A	1.15379	downregulated
ENSG00000196123	KIAA0895L	1.15611	downregulated
ENSG00000104228	TRIM35	1.15716	downregulated
ENSG00000182504	CEP97	1.164	downregulated
ENSG00000136828	RALGPS1	1.16965	downregulated
ENSG00000117523	PRRC2C	1.1712	downregulated
ENSG00000006740	ARHGAP44	1.17124	downregulated
ENSG00000130844	ZNF331	1.17224	downregulated
ENSG00000079277	MKNK1	1.17346	downregulated
ENSG00000181924	CHCHD8	1.17445	downregulated
ENSG00000245937	CTC-228N24.3	1.17496	downregulated
ENSG00000006837	CDKL3	1.18046	downregulated
ENSG00000134186	PRPF38B	1.18381	downregulated
ENSG00000067225	PKM2	1.18442	downregulated
ENSG00000122481	RWDD3	1.18445	downregulated
ENSG00000104756	KCTD9	1.18565	downregulated
ENSG00000169359	SLC33A1	1.18601	downregulated
ENSG00000106603	C7orf44	1.18846	downregulated
ENSG00000166024	C10orf28	1.19084	downregulated
ENSG00000137770	CTDSPL2	1.19095	downregulated
ENSG00000158163	DZIP1L	1.19371	downregulated
ENSG00000123485	HJURP	1.1958	downregulated
ENSG00000105821	DNAJC2	1.19589	downregulated
ENSG00000149532	CPSF7	1.19635	downregulated
ENSG00000160688	FLAD1	1.20027	downregulated
ENSG00000227124	ZNF717	1.20298	downregulated
ENSG00000111907	TPD52L1	1.20358	downregulated
ENSG00000011426	ANLN	1.20682	downregulated
ENSG00000171940	ZNF217	1.20733	downregulated
ENSG00000131374	TBC1D5	1.20833	downregulated
ENSG00000004534	RBM6	1.21372	downregulated
ENSG00000148225	WDR31	1.21625	downregulated
ENSG00000136536	7-Mar	1.21989	downregulated
ENSG00000197121	PGAP1	1.22258	downregulated
ENSG00000112701	SENP6	1.22288	downregulated
ENSG00000182646	FAM156A	1.22374	downregulated
ENSG00000164828	SUN1	1.22735	downregulated
ENSG00000112031	MTRF1L	1.22764	downregulated
ENSG00000065717	TLE2	1.23596	downregulated
ENSG00000132170	PPARG	1.242	downregulated
ENSG00000087884	C11orf67	1.24382	downregulated
ENSG00000123562	MORF4L2	1.24473	downregulated
ENSG00000099901	RANBP1	1.24885	downregulated
ENSG00000111832	RWDD1	1.24981	downregulated
ENSG00000171055	FEZ2	1.2509	downregulated
ENSG00000130402	ACTN4	1.2515	downregulated
ENSG00000183077	AFMID	1.25304	downregulated
ENSG00000185787	MORF4L1	1.25636	downregulated
ENSG00000165275	RG9MTD3	1.2592	downregulated
ENSG00000121350	PYROXD1	1.26091	downregulated
ENSG00000105865	DUS4L	1.2627	downregulated
ENSG00000134077	THUMPD3	1.26313	downregulated
ENSG00000166579	NDEL1	1.26358	downregulated
ENSG00000122126	OCRL	1.26848	downregulated
ENSG00000055917	PUM2	1.27193	downregulated
ENSG00000092094	OSGEP	1.27392	downregulated
ENSG00000138778	CENPE	1.27504	downregulated
ENSG00000100802	C14orf93	1.2754	downregulated
ENSG00000154310	TNIK	1.27588	downregulated
ENSG00000183955	SETD8	1.27601	downregulated
ENSG00000157796	WDR19	1.28239	downregulated
ENSG00000036549	ZZZ3	1.28258	downregulated
ENSG00000165806	CASP7	1.28537	downregulated
ENSG00000124177	CHD6	1.28892	downregulated
ENSG00000196636	ACN9	1.28914	downregulated
ENSG00000189308	LIN54	1.28933	downregulated
ENSG00000114126	TFDP2	1.28967	downregulated
ENSG00000133142	TCEAL4	1.2954	downregulated
ENSG00000251022	RP11-163O17.1	1.29787	downregulated
ENSG00000163319	MRPS18C	1.29894	downregulated
ENSG00000110422	HIPK3	1.30075	downregulated
ENSG00000198718	FAM179B	1.3019	downregulated
ENSG00000170791	CHCHD7	1.30246	downregulated
ENSG00000127191	TRAF2	1.30537	downregulated
ENSG00000004455	AK2	1.30806	downregulated
ENSG00000100154	TTC28	1.30975	downregulated
ENSG00000178449	C12orf62	1.31431	downregulated
ENSG00000023330	ALAS1	1.31785	downregulated
ENSG00000109458	GAB1	1.32348	downregulated
ENSG00000197976	AKAP17A	1.32489	downregulated
ENSG00000009780	FAM76A	1.32942	downregulated
ENSG00000143033	MTF2	1.33433	downregulated
ENSG00000198925	ATG9A	1.33461	downregulated
ENSG00000149932	TMEM219	1.33523	downregulated
ENSG00000070610	GBA2	1.33613	downregulated
ENSG00000134470	IL15RA	1.33684	downregulated
ENSG00000123374	CDK2	1.34036	downregulated
ENSG00000085185	BCORL1	1.34279	downregulated
ENSG00000128284	APOL3	1.34385	downregulated
ENSG00000135913	USP37	1.34503	downregulated
ENSG00000135049	AGTPBP1	1.34759	downregulated
ENSG00000154743	TSEN2	1.3483	downregulated
ENSG00000113282	CLINT1	1.34884	downregulated
ENSG00000136754	ABI1	1.34982	downregulated
ENSG00000100814	CCNB1IP1	1.34987	downregulated
ENSG00000118260	CREB1	1.34999	downregulated
ENSG00000169814	BTD	1.35079	downregulated
ENSG00000124596	C6orf130	1.35163	downregulated
ENSG00000250565	ATP6V1E2	1.35504	downregulated
ENSG00000141564	RPTOR	1.35849	downregulated
ENSG00000140464	PML	1.36465	downregulated
ENSG00000198715	C1orf85	1.36598	downregulated
ENSG00000150995	ITPR1	1.3688	downregulated
ENSG00000140553	UNC45A	1.37442	downregulated
ENSG00000120539	MASTL	1.37445	downregulated
ENSG00000153310	FAM49B	1.37632	downregulated
ENSG00000119596	YLPM1	1.37809	downregulated
ENSG00000163913	IFT122	1.37989	downregulated
ENSG00000168255	POLR2J3	1.38389	downregulated
ENSG00000112200	ZNF451	1.39826	downregulated
ENSG00000178950	GAK	1.39977	downregulated
ENSG00000138293	NCOA4	1.40348	downregulated
ENSG00000135111	TBX3	1.4035	downregulated
ENSG00000029153	ARNTL2	1.40585	downregulated
ENSG00000134152	C15orf29	1.41265	downregulated
ENSG00000204152	TIMM23B	1.41419	downregulated
ENSG00000142856	ITGB3BP	1.41443	downregulated
ENSG00000137965	IFI44	1.41703	downregulated
ENSG00000140153	WDR20	1.41837	downregulated
ENSG00000079819	EPB41L2	1.41859	downregulated
ENSG00000153914	SREK1	1.41959	downregulated
ENSG00000144674	GOLGA4	1.42142	downregulated
ENSG00000101493	ZNF516	1.42312	downregulated
ENSG00000148737	TCF7L2	1.42671	downregulated
ENSG00000055070	C1orf144	1.42677	downregulated
ENSG00000163608	C3orf17	1.43027	downregulated
ENSG00000189306	RRP7A	1.43559	downregulated
ENSG00000011454	RABGAP1	1.43618	downregulated
ENSG00000140105	WARS	1.43856	downregulated
ENSG00000046647	GEMIN8	1.4447	downregulated
ENSG00000116001	TIA1	1.44717	downregulated
ENSG00000100592	DAAM1	1.44966	downregulated
ENSG00000175309	AGXT2L2	1.45044	downregulated
ENSG00000095209	TMEM38B	1.4531	downregulated
ENSG00000171320	ESCO2	1.45321	downregulated
ENSG00000074266	EED	1.46055	downregulated
ENSG00000173402	DAG1	1.46518	downregulated
ENSG00000100211	CBY1	1.46648	downregulated
ENSG00000099250	NRP1	1.46651	downregulated
ENSG00000163625	WDFY3	1.47166	downregulated
ENSG00000213753	AC016629.2	1.47356	downregulated
ENSG00000101639	CEP192	1.47649	downregulated
ENSG00000129562	DAD1	1.47759	downregulated
ENSG00000125691	RPL23	1.47911	downregulated
ENSG00000128641	MYO1B	1.48246	downregulated
ENSG00000147383	NSDHL	1.4847	downregulated
ENSG00000188917	TRMT2B	1.48738	downregulated
ENSG00000213066	FGFR1OP	1.49309	downregulated
ENSG00000092140	G2E3	1.49727	downregulated
ENSG00000111725	PRKAB1	1.5006	downregulated
ENSG00000135365	PHF21A	1.50154	downregulated
ENSG00000159023	EPB41	1.50169	downregulated
ENSG00000133226	SRRM1	1.50874	downregulated
ENSG00000047634	SCML1	1.51154	downregulated
ENSG00000116237	ICMT	1.51438	downregulated
ENSG00000165630	PRPF18	1.52307	downregulated
ENSG00000180385	AC034193.5	1.52358	downregulated
ENSG00000143393	PI4KB	1.53256	downregulated
ENSG00000110066	SUV420H1	1.5344	downregulated
ENSG00000089159	PXN	1.53693	downregulated
ENSG00000196712	NF1	1.53801	downregulated
ENSG00000168591	TMUB2	1.53935	downregulated
ENSG00000151743	AMN1	1.54078	downregulated
ENSG00000204116	CHIC1	1.54556	downregulated
ENSG00000183814	LIN9	1.54809	downregulated
ENSG00000111912	NCOA7	1.54922	downregulated
ENSG00000214078	CPNE1	1.55026	downregulated
ENSG00000055955	ITIH4	1.55337	downregulated
ENSG00000198393	ZNF26	1.55529	downregulated
ENSG00000135655	USP15	1.55708	downregulated
ENSG00000129347	KRI1	1.56488	downregulated
ENSG00000247708	RP11-323F5.2	1.5661	downregulated
ENSG00000138802	SEC24B	1.57506	downregulated
ENSG00000131238	PPT1	1.58168	downregulated
ENSG00000118705	RPN2	1.58692	downregulated
ENSG00000100150	DEPDC5	1.59001	downregulated
ENSG00000073921	PICALM	1.59443	downregulated
ENSG00000251381	CTC-497E21.4	1.59468	downregulated
ENSG00000100348	TXN2	1.59831	downregulated
ENSG00000181450	ZNF678	1.60192	downregulated
ENSG00000100578	KIAA0586	1.61188	downregulated
ENSG00000157869	RAB28	1.6162	downregulated
ENSG00000127914	AKAP9	1.6178	downregulated
ENSG00000150433	TMEM218	1.62246	downregulated
ENSG00000101266	CSNK2A1	1.62391	downregulated
ENSG00000160685	ZBTB7B	1.63656	downregulated
ENSG00000102384	CENPI	1.63862	downregulated
ENSG00000104497	SNX16	1.65163	downregulated
ENSG00000168374	ARF4	1.65389	downregulated
ENSG00000205726	ITSN1	1.6591	downregulated
ENSG00000172775	FAM192A	1.66195	downregulated
ENSG00000175416	CLTB	1.66507	downregulated
ENSG00000022840	RNF10	1.67358	downregulated
ENSG00000139112	GABARAPL1	1.67608	downregulated
ENSG00000197150	ABCB8	1.68005	downregulated
ENSG00000122678	POLM	1.69049	downregulated
ENSG00000148498	PARD3	1.69172	downregulated
ENSG00000155329	ZCCHC10	1.701	downregulated
ENSG00000105176	C19orf2	1.70706	downregulated
ENSG00000139354	GAS2L3	1.70761	downregulated
ENSG00000005189	AC004381.6	1.70979	downregulated
ENSG00000241553	ARPC4	1.71405	downregulated
ENSG00000164180	TMEM161B	1.71539	downregulated
ENSG00000182287	AP1S2	1.71629	downregulated
ENSG00000009950	MLXIPL	1.71902	downregulated
ENSG00000085721	RRN3	1.72227	downregulated
ENSG00000156958	GALK2	1.72418	downregulated
ENSG00000163138	PACRGL	1.72443	downregulated
ENSG00000145782	ATG12	1.72825	downregulated
ENSG00000100697	DICER1	1.73228	downregulated
ENSG00000167081	PBX3	1.73732	downregulated
ENSG00000003756	RBM5	1.74578	downregulated
ENSG00000182185	RAD51B	1.7484	downregulated
ENSG00000197021	CXorf40B	1.7492	downregulated
ENSG00000103194	USP10	1.75252	downregulated
ENSG00000196998	WDR45	1.75797	downregulated
ENSG00000196387	ZNF140	1.7605	downregulated
ENSG00000127952	STYXL1	1.76133	downregulated
ENSG00000160310	PRMT2	1.76813	downregulated
ENSG00000119314	ROD1	1.7718	downregulated
ENSG00000156411	C14orf2	1.772	downregulated
ENSG00000148153	C9orf80	1.77445	downregulated
ENSG00000156170	C8orf38	1.77728	downregulated
ENSG00000071189	SNX13	1.77946	downregulated
ENSG00000169193	CCDC126	1.78113	downregulated
ENSG00000243477	NAT6	1.78855	downregulated
ENSG00000185044	BX004987.4	1.7919	downregulated
ENSG00000133961	NUMB	1.79746	downregulated
ENSG00000092871	RFFL	1.79802	downregulated
ENSG00000165675	ENOX2	1.80122	downregulated
ENSG00000096093	EFHC1	1.80381	downregulated
ENSG00000104613	INTS10	1.80768	downregulated
ENSG00000132749	MTL5	1.81243	downregulated
ENSG00000161813	LARP4	1.81428	downregulated
ENSG00000204842	ATXN2	1.82018	downregulated
ENSG00000066697	C9orf30	1.83704	downregulated
ENSG00000006114	SYNRG	1.83853	downregulated
ENSG00000165304	MELK	1.84461	downregulated
ENSG00000065882	TBC1D1	1.84748	downregulated
ENSG00000059588	TARBP1	1.84961	downregulated
ENSG00000121741	ZMYM2	1.85012	downregulated
ENSG00000224660	AC087590.3	1.85279	downregulated
ENSG00000187239	FNBP1	1.85445	downregulated
ENSG00000131115	ZNF227	1.86332	downregulated
ENSG00000111731	KIAA0528	1.86701	downregulated
ENSG00000196756	RP4-564F22.2	1.88065	downregulated
ENSG00000158092	NCK1	1.88391	downregulated
ENSG00000078304	PPP2R5C	1.88662	downregulated
ENSG00000112763	BTN2A1	1.89036	downregulated
ENSG00000125772	GPCPD1	1.89055	downregulated
ENSG00000079150	FKBP7	1.89467	downregulated
ENSG00000206573	RP11-58B17.1	1.89751	downregulated
ENSG00000131051	RBM39	1.90167	downregulated
ENSG00000106080	FKBP14	1.90263	downregulated
ENSG00000136699	SMPD4	1.90862	downregulated
ENSG00000080823	MOK	1.91053	downregulated
ENSG00000146373	RNF217	1.91441	downregulated
ENSG00000149182	ARFGAP2	1.91604	downregulated
ENSG00000167646	C19orf51	1.92601	downregulated
ENSG00000217128	FNIP1	1.92731	downregulated
ENSG00000130669	PAK4	1.92958	downregulated
ENSG00000167491	GATAD2A	1.93782	downregulated
ENSG00000138593	SECISBP2L	1.93837	downregulated
ENSG00000165501	LRR1	1.94621	downregulated
ENSG00000132676	DAP3	1.95313	downregulated
ENSG00000090097	PCBP4	1.95394	downregulated
ENSG00000131069	ACSS2	1.95663	downregulated
ENSG00000111540	RAB5B	1.9594	downregulated
ENSG00000187961	KLHL17	1.95977	downregulated
ENSG00000103197	TSC2	1.97009	downregulated
ENSG00000123595	RAB9A	1.97058	downregulated
ENSG00000144785	RP11-977G19.10	1.97261	downregulated
ENSG00000116698	SMG7	1.98213	downregulated
ENSG00000077157	PPP1R12B	1.98304	downregulated
ENSG00000114120	SLC25A36	1.98698	downregulated
ENSG00000100263	RHBDD3	1.9984	downregulated
ENSG00000150756	FAM173B	2.00268	downregulated
ENSG00000113648	H2AFY	2.00328	downregulated
ENSG00000256128	RP11-173C20.2	2.02239	downregulated
ENSG00000106610	STAG3L4	2.02442	downregulated
ENSG00000164031	DNAJB14	2.03397	downregulated
ENSG00000101452	DHX35	2.04549	downregulated
ENSG00000110497	AMBRA1	2.05146	downregulated
ENSG00000121390	PSPC1	2.05393	downregulated
ENSG00000088448	ANKRD10	2.06104	downregulated
ENSG00000062485	CS	2.06968	downregulated
ENSG00000119686	FLVCR2	2.072	downregulated
ENSG00000123415	SMUG1	2.08528	downregulated
ENSG00000150456	N6AMT2	2.08743	downregulated
ENSG00000165322	ARHGAP12	2.09921	downregulated
ENSG00000196352	CD55	2.10073	downregulated
ENSG00000171302	CANT1	2.10083	downregulated
ENSG00000232995	RP11-267N12.3	2.10413	downregulated
ENSG00000219481	NBPF1	2.11148	downregulated
ENSG00000102908	NFAT5	2.11195	downregulated
ENSG00000148843	PDCD11	2.11858	downregulated
ENSG00000135090	TAOK3	2.13959	downregulated
ENSG00000164830	OXR1	2.14542	downregulated
ENSG00000101040	ZMYND8	2.15191	downregulated
ENSG00000072736	NFATC3	2.15374	downregulated
ENSG00000125695	STRADA	2.15848	downregulated
ENSG00000119661	DNAL1	2.17044	downregulated
ENSG00000008128	CDK11A	2.17411	downregulated
ENSG00000122507	BBS9	2.17851	downregulated
ENSG00000125319	C17orf53	2.17942	downregulated
ENSG00000111727	HCFC2	2.1815	downregulated
ENSG00000172965	AC068491.1	2.18516	downregulated
ENSG00000197713	RPE	2.1866	downregulated
ENSG00000253716	RP13-582O9.5	2.18984	downregulated
ENSG00000042317	SPATA7	2.19103	downregulated
ENSG00000026508	CD44	2.20112	downregulated
ENSG00000040275	CCDC99	2.20426	downregulated
ENSG00000116791	CRYZ	2.20481	downregulated
ENSG00000122643	NT5C3	2.20628	downregulated
ENSG00000159346	ADIPOR1	2.21515	downregulated
ENSG00000174720	LARP7	2.23031	downregulated
ENSG00000155508	CNOT8	2.24188	downregulated
ENSG00000198039	ZNF273	2.2458	downregulated
ENSG00000168813	ZNF507	2.26153	downregulated
ENSG00000232527	RP11-14N7.2	2.26872	downregulated
ENSG00000112290	WASF1	2.28092	downregulated
ENSG00000135250	SRPK2	2.29226	downregulated
ENSG00000152942	RAD17	2.31563	downregulated
ENSG00000073614	KDM5A	2.31681	downregulated
ENSG00000106853	PTGR1	2.31855	downregulated
ENSG00000059377	TBXAS1	2.31901	downregulated
ENSG00000104529	EEF1D	2.32896	downregulated
ENSG00000077684	PHF17	2.34032	downregulated
ENSG00000138674	SEC31A	2.35471	downregulated
ENSG00000197555	SIPA1L1	2.35477	downregulated
ENSG00000155542	C5orf35	2.3557	downregulated
ENSG00000164659	KIAA1324L	2.36238	downregulated
ENSG00000170776	AKAP13	2.37874	downregulated
ENSG00000115966	ATF2	2.379	downregulated
ENSG00000100325	ASCC2	2.38215	downregulated
ENSG00000247828	CTC-358I24.1	2.38597	downregulated
ENSG00000135480	KRT7	2.40175	downregulated
ENSG00000197603	C5orf42	2.41325	downregulated
ENSG00000140859	KIFC3	2.41377	downregulated
ENSG00000124191	TOX2	2.42935	downregulated
ENSG00000078403	MLLT10	2.43563	downregulated
ENSG00000003989	SLC7A2	2.44559	downregulated
ENSG00000175054	ATR	2.44612	downregulated
ENSG00000028203	VEZT	2.44769	downregulated
ENSG00000130590	SAMD10	2.44986	downregulated
ENSG00000196204	RNF216P1	2.45267	downregulated
ENSG00000102225	CDK16	2.45642	downregulated
ENSG00000180229	HERC2P3	2.46536	downregulated
ENSG00000172939	OXSR1	2.47095	downregulated
ENSG00000179912	R3HDM2	2.47673	downregulated
ENSG00000117262	GPR89A	2.48537	downregulated
ENSG00000116754	SRSF11	2.49503	downregulated
ENSG00000085274	MYNN	2.50151	downregulated
ENSG00000109920	FNBP4	2.50986	downregulated
ENSG00000170802	FOXN2	2.52952	downregulated
ENSG00000179818	PCBP1-AS1	2.54123	downregulated
ENSG00000175581	MRPL48	2.54448	downregulated
ENSG00000136270	TBRG4	2.5476	downregulated
ENSG00000147862	NFIB	2.54844	downregulated
ENSG00000152939	MARVELD2	2.54877	downregulated
ENSG00000108825	AARSD1	2.55966	downregulated
ENSG00000204406	MBD5	2.57523	downregulated
ENSG00000213865	C8orf44	2.58282	downregulated
ENSG00000015153	YAF2	2.59819	downregulated
ENSG00000125846	ZNF133	2.60476	downregulated
ENSG00000116353	MECR	2.61359	downregulated
ENSG00000145331	RG9MTD2	2.61504	downregulated
ENSG00000115641	FHL2	2.62473	downregulated
ENSG00000161642	ZNF385A	2.63892	downregulated
ENSG00000130066	SAT1	2.64256	downregulated
ENSG00000123411	IKZF4	2.65232	downregulated
ENSG00000005889	ZFX	2.65515	downregulated
ENSG00000093167	LRRFIP2	2.66319	downregulated
ENSG00000163482	STK36	2.66494	downregulated
ENSG00000139146	FAM60A	2.67744	downregulated
ENSG00000101236	RNF24	2.67964	downregulated
ENSG00000175471	MCTP1	2.69708	downregulated
ENSG00000126091	ST3GAL3	2.71391	downregulated
ENSG00000133835	HSD17B4	2.72998	downregulated
ENSG00000138698	RAP1GDS1	2.7327	downregulated
ENSG00000148690	FRA10AC1	2.73397	downregulated
ENSG00000039319	ZFYVE16	2.74469	downregulated
ENSG00000100558	PLEK2	2.76319	downregulated
ENSG00000204120	GIGYF2	2.78744	downregulated
ENSG00000111237	VPS29	2.79721	downregulated
ENSG00000074582	BCS1L	2.83422	downregulated
ENSG00000015676	NUDCD3	2.86451	downregulated
ENSG00000125814	NAPB	2.91094	downregulated
ENSG00000164733	CTSB	2.9263	downregulated
ENSG00000111266	DUSP16	2.94354	downregulated
ENSG00000104047	DTWD1	2.97429	downregulated
ENSG00000119509	INVS	2.97452	downregulated
ENSG00000128607	KLHDC10	2.97861	downregulated
ENSG00000158062	UBXN11	2.98742	downregulated
ENSG00000149196	C11orf73	2.99169	downregulated
ENSG00000072803	FBXW11	2.99209	downregulated
ENSG00000144306	SCRN3	2.99216	downregulated
ENSG00000066651	TRMT11	2.99933	downregulated
ENSG00000164663	USP49	3.01261	downregulated
ENSG00000117682	DHDDS	3.07949	downregulated
ENSG00000147854	UHRF2	3.12493	downregulated
ENSG00000092199	HNRNPC	3.13251	downregulated
ENSG00000151572	ANO4	3.14172	downregulated
ENSG00000103494	RPGRIP1L	3.1803	downregulated
ENSG00000221886	C5orf54	3.18708	downregulated
ENSG00000135945	REV1	3.19105	downregulated
ENSG00000102393	GLA	3.19768	downregulated
ENSG00000133318	RTN3	3.20481	downregulated
ENSG00000149187	CELF1	3.20952	downregulated
ENSG00000112339	HBS1L	3.22018	downregulated
ENSG00000125454	SLC25A19	3.23754	downregulated
ENSG00000107938	C10orf137	3.28184	downregulated
ENSG00000139116	KIF21A	3.2973	downregulated
ENSG00000123106	CCDC91	3.30607	downregulated
ENSG00000123405	NFE2	3.36229	downregulated
ENSG00000187790	FANCM	3.44542	downregulated
ENSG00000118518	RNF146	3.54156	downregulated
ENSG00000147996	CBWD5	3.60039	downregulated
ENSG00000156469	MTERFD1	3.62443	downregulated
ENSG00000083799	CYLD	3.64359	downregulated
ENSG00000164654	MIOS	3.68963	downregulated
ENSG00000111011	RSRC2	3.71199	downregulated
ENSG00000158161	EYA3	3.75422	downregulated
ENSG00000112972	HMGCS1	3.79942	downregulated
ENSG00000204623	ZNRD1-AS1	3.81718	downregulated
ENSG00000198218	QRICH1	3.86731	downregulated
ENSG00000189046	ALKBH2	3.86791	downregulated
ENSG00000062194	GPBP1	4.19133	downregulated
ENSG00000183337	BCOR	4.30036	downregulated
ENSG00000173166	RAPH1	4.30375	downregulated
ENSG00000065809	FAM107B	4.30739	downregulated
ENSG00000113240	CLK4	4.91782	downregulated

## Sheet: Table C
Table C. Differentially expressed genes in P53 signaling pathway
Gene	baseMean.DMSO	baseMean.Berberine	log2.foldchange	pvalue
BBC3	50.7813	206.92	2.0267	0.022293
CCNG2	604.759	2368.44	1.9695	0.0110322
GADD45B	413.637	2002.35	2.27526	0.00378755
IGFBP3	126.492	398.984	1.65729	0.0423742
FAS	283.452	907.264	1.67842	0.0322591
THBS1	1452.34	291.81	-2.31528	0.00349549
CASP9	424.716	111.418	-1.93051	0.0191065

## Sheet: Table D
Table D. Differentially expressed gene in NFkB signaling pathway
Gene	baseMean.DMSO	baseMean.Berberine	log2.foldchange	pvalue
IL6	3335.87	458.407	-2.86336	0.000341294
IL8	9468.4	2051.16	-2.20668	0.00430782
IL1A	127.118	50.8516	-1.32181	0.0321878
IL33	41.6007	4.19592	-3.30955	0.000777343
IL11	397.017	26.5282	-3.9036	2.43206e-05
NFKBIA	115.756	857.719	2.88942	0.113678
